# Supplementary material
Source: MDPI journal article supplement (https://www.mdpi.com/2073-4395/14/2/244)
Supplement: s1 [file s1]

Archive with 2 entries (2 files):
- Supplemental file 1.pdf
- Supplemental file 2.pdf
